# Supplementary material for: Degradation of Cellular miR-27 by a Novel, Highly Abundant Viral Transcript Is Important for Efficient Virus Replication In Vivo
Source: PLoS Pathog. 2012 Feb 9;8(2):e1002510. doi: 10.1371/journal.ppat.1002510 (PMC3276556; doi:10.1371/journal.ppat.1002510)
Supplement: Table S2 — miR-27b Sequences from total RNA and Ago2-IP used to generate Figure 2D . Sequences that were used to generate the sequence logo representation of miR-27b in Figure 2D. The full-length sequence is indicated in grey at the top of the list, and sequences presenting with 3′ additions are listed afterward. For each sequence, the size and the normalized number of reads (per million miRNA reads) are indicated. Only sequences cloned at least once per 1×106 miRNA reads were taken into account. (XLS) [file ppat.1002510.s005.xls]

## Sheet: Supplementary Table 2 (miR-27b)
Table S2: miR-27b Sequences from total RNA and Ago2-IP used to generate Figure 2D
Sequences that were used to generate the sequence logo representation of miR-27b in Figure 2D. The full-length sequence is indicated in grey at the top of the list, and sequences presenting with 3’ additions are listed afterward. For each sequence, the size and the normalized number of reads (per million miRNA reads) are indicated. Only sequences cloned at least once per 1x106 miRNA reads have be…
miR	NIH-3T3, total RNA, mock			NIH-3T3, total RNA, 6 hpi MCMV			NIH-3T3, Ago2 IP, mock			NIH-3T3, Ago2 IP, 6 hpi MCMV
	Sequence	Length	Read nb (per M)	Sequence	Length	Read nb (per M)	Sequence	Length	Read nb (per M)	Sequence	Length	Read nb (per M)
mmu-miR-27b	UUCACAGUGGCUAAGUUCUGC	21	3326	UUCACAGUGGCUAAGUUCUGC	21	3315	UUCACAGUGGCUAAGUUCUGC	21	3514	UUCACAGUGGCUAAGUUCUGC	21	2490
	UUCACAGUGGCUAAGUUCUCCA	22	1	UUCACAGUGGCUAAGUUCUGAA	22	55	UUCACAGUGGCUAAGUUCUGAA	22	36	UUCACAGUGGCUAAGUUCUGAA	22	35
	UUCACAGUGGCUAAGUUCUCCU	22	1	UUCACAGUGGCUAAGUUCUGAG	22	50	UUCACAGUGGCUAAGUUCUGAC	22	2	UUCACAGUGGCUAAGUUCUGAG	22	1
	UUCACAGUGGCUAAGUUCUGAA	22	41	UUCACAGUGGCUAAGUUCUGAU	22	55	UUCACAGUGGCUAAGUUCUGAG	22	2	UUCACAGUGGCUAAGUUCUGAU	22	8
	UUCACAGUGGCUAAGUUCUGAG	22	2	UUCACAGUGGCUAAGUUCUGCA	22	109	UUCACAGUGGCUAAGUUCUGAU	22	8	UUCACAGUGGCUAAGUUCUGCA	22	165
	UUCACAGUGGCUAAGUUCUGAU	22	9	UUCACAGUGGCUAAGUUCUGCU	22	185	UUCACAGUGGCUAAGUUCUGCA	22	276	UUCACAGUGGCUAAGUUCUGCC	22	2
	UUCACAGUGGCUAAGUUCUGCA	22	300	UUCACAGUGGCUAAGUUCUGAAA	23	113	UUCACAGUGGCUAAGUUCUGCC	22	5	UUCACAGUGGCUAAGUUCUGCU	22	119
	UUCACAGUGGCUAAGUUCUGCC	22	8	UUCACAGUGGCUAAGUUCUGAUC	23	6	UUCACAGUGGCUAAGUUCUGCU	22	207	UUCACAGUGGCUAAGUUCUUUU	22	2
	UUCACAGUGGCUAAGUUCUGCG	22	4	UUCACAGUGGCUAAGUUCUGCAA	23	187	UUCACAGUGGCUAAGUUCUGUA	22	1	UUCACAGUGGCUAAGUUCUGAAA	23	19
	UUCACAGUGGCUAAGUUCUGCU	22	242	UUCACAGUGGCUAAGUUCUGCAG	23	39	UUCACAGUGGCUAAGUUCUGUU	22	2	UUCACAGUGGCUAAGUUCUGAAC	23	1
	UUCACAGUGGCUAAGUUCUGUA	22	2	UUCACAGUGGCUAAGUUCUGCAU	23	135	UUCACAGUGGCUAAGUUCUGAAA	23	17	UUCACAGUGGCUAAGUUCUGAAG	23	1
	UUCACAGUGGCUAAGUUCUGUU	22	1	UUCACAGUGGCUAAGUUCUGCAAA	24	48	UUCACAGUGGCUAAGUUCUGAAC	23	2	UUCACAGUGGCUAAGUUCUGAAU	23	6
	UUCACAGUGGCUAAGUUUUGCA	22	2	UUCACAGUGGCUAAGUUCUGCAAU	24	130	UUCACAGUGGCUAAGUUCUGAAU	23	7	UUCACAGUGGCUAAGUUCUGACA	23	1
	UUCACAGUGGCUAAGUUUUGCU	22	1	UUCACAGUGGCUAAGUUAUGCAAGA	25	1	UUCACAGUGGCUAAGUUCUGAGA	23	2	UUCACAGUGGCUAAGUUCUGAGA	23	1
	UUCACAGUGGCUAAGUUCUGAAA	23	19	UUCACAGUGGCUAAGUUCUGCAAAA	25	55	UUCACAGUGGCUAAGUUCUGCAA	23	224	UUCACAGUGGCUAAGUUCUGCAA	23	158
	UUCACAGUGGCUAAGUUCUGAAG	23	1	UUCACAGUGGCUAAGUUCUGCAAGA	25	18	UUCACAGUGGCUAAGUUCUGCAC	23	6	UUCACAGUGGCUAAGUUCUGCAC	23	5
	UUCACAGUGGCUAAGUUCUGAAU	23	3	UUCACAGUGGCUAAGUUCUGCAAUAA	26	29	UUCACAGUGGCUAAGUUCUGCAG	23	10	UUCACAGUGGCUAAGUUCUGCAG	23	11
	UUCACAGUGGCUAAGUUCUGACA	23	1	UUCACAGUGGCUAAGUUCUGCAUAAU	26	53	UUCACAGUGGCUAAGUUCUGCAU	23	140	UUCACAGUGGCUAAGUUCUGCAU	23	113
	UUCACAGUGGCUAAGUUCUGAGU	23	1	UUCACAGUGGCUAAGUUCUGCAUAAAA	27	27	UUCACAGUGGCUAAGUUCUGCCU	23	2	UUCACAGUGGCUAAGUUCUGCGA	23	1
	UUCACAGUGGCUAAGUUCUGCAA	23	213				UUCACAGUGGCUAAGUUCUGCGA	23	3	UUCACAGUGGCUAAGUUCUGCUA	23	1
	UUCACAGUGGCUAAGUUCUGCAC	23	5				UUCACAGUGGCUAAGUUCUGCGU	23	1	UUCACAGUGGCUAAGUUCUGCUU	23	3
	UUCACAGUGGCUAAGUUCUGCAG	23	12				UUCACAGUGGCUAAGUUCUGCUA	23	2	UUCACAGUGGCUAAGUUCUGAAAA	24	2
	UUCACAGUGGCUAAGUUCUGCAU	23	112				UUCACAGUGGCUAAGUUCUGCUU	23	5	UUCACAGUGGCUAAGUUCUGCAAA	24	47
	UUCACAGUGGCUAAGUUCUGCCA	23	3				UUCACAGUGGCUAAGUUCUGAAAA	24	2	UUCACAGUGGCUAAGUUCUGCAAC	24	4
	UUCACAGUGGCUAAGUUCUGCCU	23	2				UUCACAGUGGCUAAGUUCUGCAAA	24	26	UUCACAGUGGCUAAGUUCUGCAAG	24	5
	UUCACAGUGGCUAAGUUCUGCGU	23	1				UUCACAGUGGCUAAGUUCUGCAAC	24	3	UUCACAGUGGCUAAGUUCUGCAAU	24	36
	UUCACAGUGGCUAAGUUCUGCUA	23	5				UUCACAGUGGCUAAGUUCUGCAAG	24	3	UUCACAGUGGCUAAGUUCUGCAGA	24	2
	UUCACAGUGGCUAAGUUCUGCUU	23	3				UUCACAGUGGCUAAGUUCUGCAAU	24	34	UUCACAGUGGCUAAGUUCUGCAUA	24	2
	UUCACAGUGGCUAAGUUCUGUAA	23	4				UUCACAGUGGCUAAGUUCUGCAGA	24	2	UUCACAGUGGCUAAGUUCUGCAUU	24	3
	UUCACAGUGGCUAAGUUCUGUAU	23	1				UUCACAGUGGCUAAGUUCUGCAGU	24	3	UUCACAGUGGCUAAGUUCUGCUAA	24	2
	UUCACAGUGGCUAAGUUUUGCAA	23	1				UUCACAGUGGCUAAGUUCUGCAUA	24	4	UUCACAGUGGCUAAGUUCUGCUAU	24	2
	UUCACAGUGGCUAAGUUCUGCAAA	24	39				UUCACAGUGGCUAAGUUCUGCAUU	24	9	UUCACAGUGGCUAAGUUCUGCAAAA	25	16
	UUCACAGUGGCUAAGUUCUGCAAC	24	1				UUCACAGUGGCUAAGUUCUGCUAA	24	1	UUCACAGUGGCUAAGUUCUGCAAAG	25	3
	UUCACAGUGGCUAAGUUCUGCAAG	24	6				UUCACAGUGGCUAAGUUCUGCUAU	24	3	UUCACAGUGGCUAAGUUCUGCAAAU	25	3
	UUCACAGUGGCUAAGUUCUGCAAU	24	46				UUCACAGUGGCUAAGUUCUGCUUU	24	1	UUCACAGUGGCUAAGUUCUGCAAGA	25	1
	UUCACAGUGGCUAAGUUCUGCAGA	24	4				UUCACAGUGGCUAAGUUCUGCAAAA	25	6	UUCACAGUGGCUAAGUUCUGCAAUA	25	1
	UUCACAGUGGCUAAGUUCUGCAGU	24	5				UUCACAGUGGCUAAGUUCUGCAAAU	25	1	UUCACAGUGGCUAAGUUCUGCAUAA	25	2
	UUCACAGUGGCUAAGUUCUGCAUA	24	5				UUCACAGUGGCUAAGUUCUGCAAUA	25	1	UUCACAGUGGCUAAGUUCUGCAUUA	25	1
	UUCACAGUGGCUAAGUUCUGCAUU	24	6				UUCACAGUGGCUAAGUUCUGCAUAA	25	1	UUCACAGUGGCUAAGUUCUGCAUUU	25	1
	UUCACAGUGGCUAAGUUCUGCUAC	24	1							UUCACAGUGGCUAAGUUCUGCAAAAA	26	4
	UUCACAGUGGCUAAGUUCUGCAAAA	25	5							UUCACAGUGGCUAAGUUCUGCAAUAA	26	1
	UUCACAGUGGCUAAGUUCUGCAAAU	25	4							UUCACAGUGGCUAAGUUCUGCAUAAA	26	2
	UUCACAGUGGCUAAGUUCUGCAUAA	25	2
	UUCACAGUGGCUAAGUUCUGCAUUA	25	1
	UUCACAGUGGCUAAGUUCUGCUUAU	25	1
	UUCACAGUGGCUAAGUUCUGCUUUA	25	1
	UUCACAGUGGCUAAGUUCUGCAAAAA	26	2
	UUCACAGUGGCUAAGUUCUGCAAAAU	26	1
	UUCACAGUGGCUAAGUUCUGCAUAAA	26	1
	UUCACAGUGGCUAAGUUCUGCUAAUU	26	1
	UUCACAGUGGCUAAGUUCUGCUUAAU	26	1
		Total	1134		Total	1295		Total	1060		Total	793
